# Supplementary material
Source: MDPI journal article supplement (https://www.mdpi.com/2073-4395/12/3/618)
Supplement: s1 [file s1]

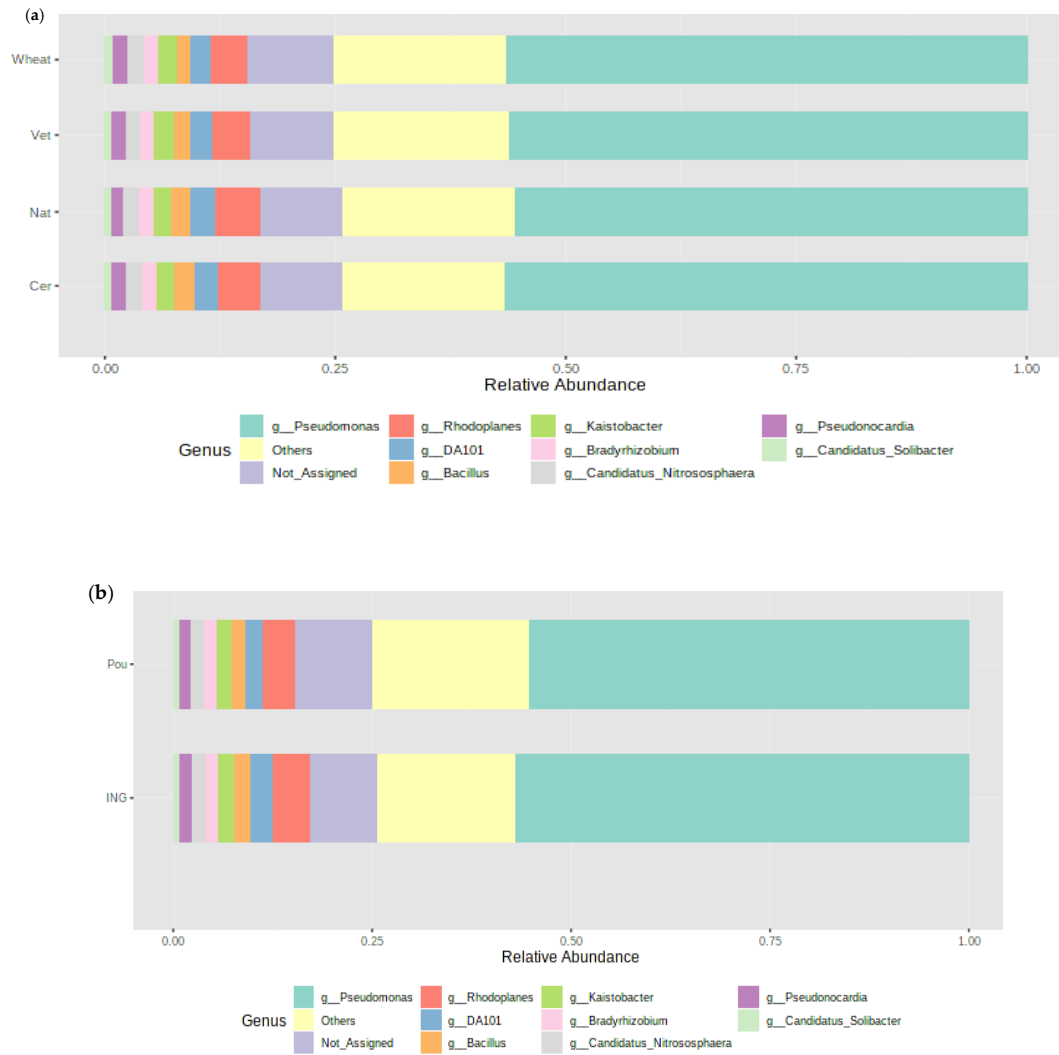

**Figure S1:** Stacked histograms showing the relative abundance of major bacteria in (a) cover crops and (b) fertilizer treatments at the genus level. (Cer-Cereal Rye; Nat- Native Vegetation; Vet- Vetch and Wheat; ING-Inorganic fertilizer; Pou- Poultry)

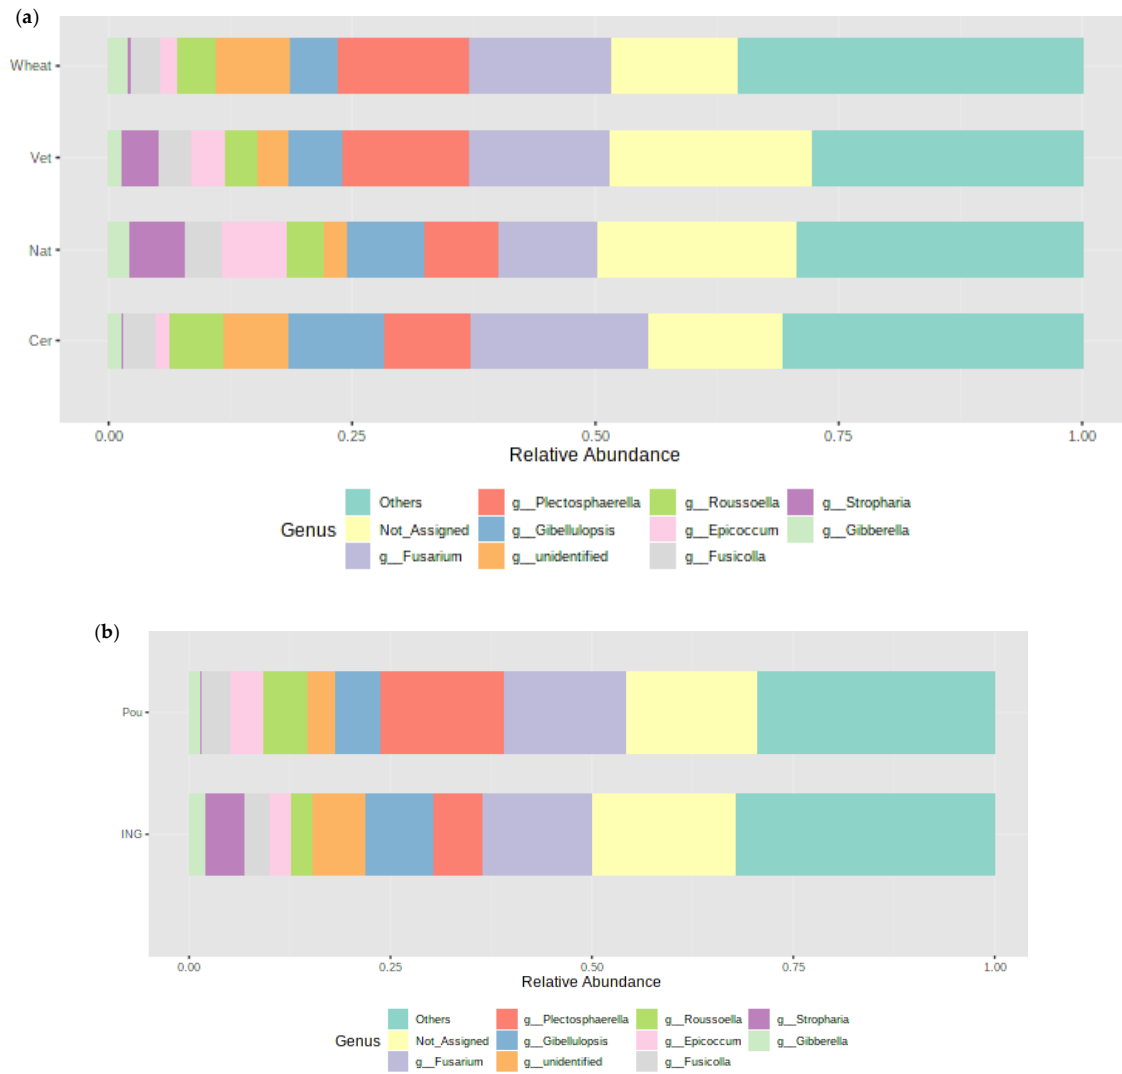

**Figure S2:** Stacked histograms showing the relative abundance of major fungi in (a) cover crops and (b) fertilizer treatments at the genus level. (Cer-Cereal Rye; Nat- Native Vegetation; Vet- Vetch and Wheat; ING-Inorganic fertilizer; Pou- Poultry)
